# Supplementary material for: Fine-Tuning of Histone H3 Lys4 Methylation During Pseudohyphal Differentiation by the CDK Submodule of RNA Polymerase II
Source: Oxford University Press journal article supplement (doi:10.1534/genetics.114.172841), 2014-12-01
Supplement: genetics.114.172841-2.pdf [file genetics.114.172841-2.pdf]

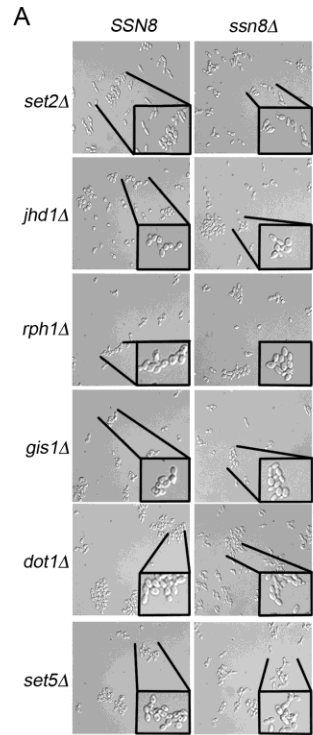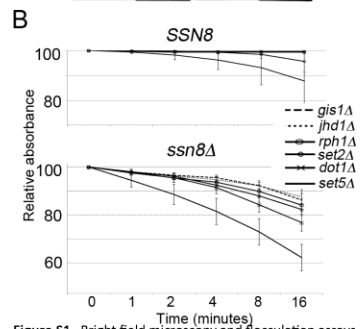

**Figure S1** Bright field microscopy and flocculation assays of histone methylation and *SSN8* yeast mutants (A) Bright field microscopy of yeast harboring the indicated mutations grown to mid-logarithmic phase in rich media. (B) Flocculation time course of yeast mutants with the indicated genotypes as described in Figure 1.
