# Supplementary material for: Fine-Tuning of Histone H3 Lys4 Methylation During Pseudohyphal Differentiation by the CDK Submodule of RNA Polymerase II
Source: Oxford University Press journal article supplement (doi:10.1534/genetics.114.172841), 2014-12-01
Supplement: genetics.114.172841-3.pdf [file genetics.114.172841-3.pdf]

**Table S1 Doubling times, budding pattern quantifications, and length-to-width ratios**

| Histone target | genotype     | SSN8         | doubling time (h) | Budding pattern |            |          | length to width ratio |        |      |
|----------------|--------------|--------------|-------------------|-----------------|------------|----------|-----------------------|--------|------|
|                |              |              |                   | % Bipolar       | % Unipolar | % Random | 25%                   | median | 75%  |
|                | wt           | +            | 1.5 ± 0.2         | 83              | 14         | 3        | 1.05                  | 1.19   | 1.39 |
|                |              | Δ            | 1.6 ± 0.1         | 43              | 52         | 5        | 1.09                  | 1.18   | 1.30 |
|                |              | <i>ssn3Δ</i> | 2.3 ± 0.5         | 68              | 30         | 2        | 1.15                  | 1.32   | 1.56 |
| H3 Lys4        | <i>set1Δ</i> | +            | 1.7 ± 0.1         | 11              | 62         | 27       | 1.08                  | 1.18   | 1.35 |
|                |              | Δ            | 1.7 ± 0.3         | 15              | 83         | 2        | 1.11                  | 1.27   | 1.50 |
|                |              | <i>ssn3Δ</i> | 2.1 ± 0.3         | 77              | 20         | 3        | 1.13                  | 1.24   | 1.38 |
|                | <i>jhd2Δ</i> | +            | 1.7 ± 0.2         | 49              | 47         | 4        | 1.10                  | 1.31   | 1.58 |
|                |              | Δ            | 1.9 ± 0.6         | 9               | 90         | 1        | 1.23                  | 1.53   | 1.87 |
|                |              | <i>ssn3Δ</i> | 2.5 ± 0.1         | 13              | 82         | 5        | 1.16                  | 1.40   | 1.69 |
| H3 Lys36       | <i>set2Δ</i> | +            | 1.9 ± 0.5         | 61              | 38         | 1        | 1.24                  | 1.43   | 1.77 |
|                |              | Δ            | 1.5 ± 0.2         | 89              | 9          | 2        | 1.16                  | 1.38   | 1.62 |
|                | <i>jhd1Δ</i> | +            | 1.6 ± 0.2         | 78              | 17         | 5        | 1.10                  | 1.21   | 1.41 |
|                |              | Δ            | 2.1 ± 0.9         | 83              | 14         | 3        | 1.14                  | 1.30   | 1.55 |
|                | <i>rph1Δ</i> | +            | 1.7 ± 0.1         | 53              | 44         | 3        | 1.14                  | 1.34   | 1.57 |
|                |              | Δ            | 1.7 ± 0.1         | 60              | 35         | 5        | 1.10                  | 1.24   | 1.41 |
|                | <i>gis1Δ</i> | +            | 2.0 ± 0.2         | 58              | 40         | 2        | 1.14                  | 1.37   | 1.64 |
|                |              | Δ            | 1.8 ± 0.5         | 17              | 82         | 1        | 1.10                  | 1.25   | 1.54 |
| H3 Lys79       | <i>dot1Δ</i> | +            | 1.7 ± 0.1         | 59              | 40         | 1        | 1.13                  | 1.29   | 1.59 |
|                |              | Δ            | 1.5 ± 0.3         | 71              | 27         | 2        | 1.14                  | 1.24   | 1.44 |
| H4 Lys5, 8, 12 | <i>set5Δ</i> | +            | 1.6 ± 0.1         | 84              | 13         | 3        | 1.12                  | 1.22   | 1.39 |
|                |              | Δ            | 1.9 ± 0.1         | 60              | 38         | 2        | 1.18                  | 1.36   | 1.61 |
