# Supplementary material for: Fine-Tuning of Histone H3 Lys4 Methylation During Pseudohyphal Differentiation by the CDK Submodule of RNA Polymerase II
Source: Oxford University Press journal article supplement (doi:10.1534/genetics.114.172841), 2014-12-01
Supplement: genetics.114.172841-4.pdf [file genetics.114.172841-4.pdf]

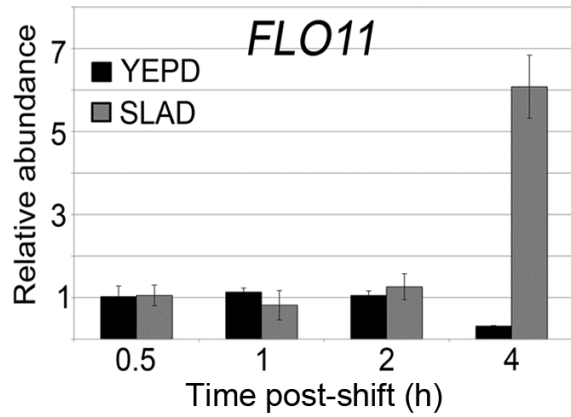

**Figure S2** *FLO11* SLAD time course optimization. *FLO11* mRNA was measured using RT-qPCR in a time course experiment. Wild type yeast cultured to mid-logarithmic phase in low peptone YEPD were harvested, washed, and shifted into either YEPD or SLAD media to monitor *FLO11* transcription kinetics. Results are from three independent biological replicates and error bars show SEM.
